# Supplementary material for: Gut eukaryotic communities in pigs: diversity, composition and host genetics contribution
Source: PubMed Central journal article supplement (PMC7807704; doi:10.1186/s42523-020-00038-4), 2020-05-07

**Supplementary figure 1.** Sample distribution of fungi (A) and protist (B) communities. Diversity indexes of fungi (C) and protist (D) communities. Blue color represents the finishing pigs (experimental farm) and red the weaned piglets (commercial farm).

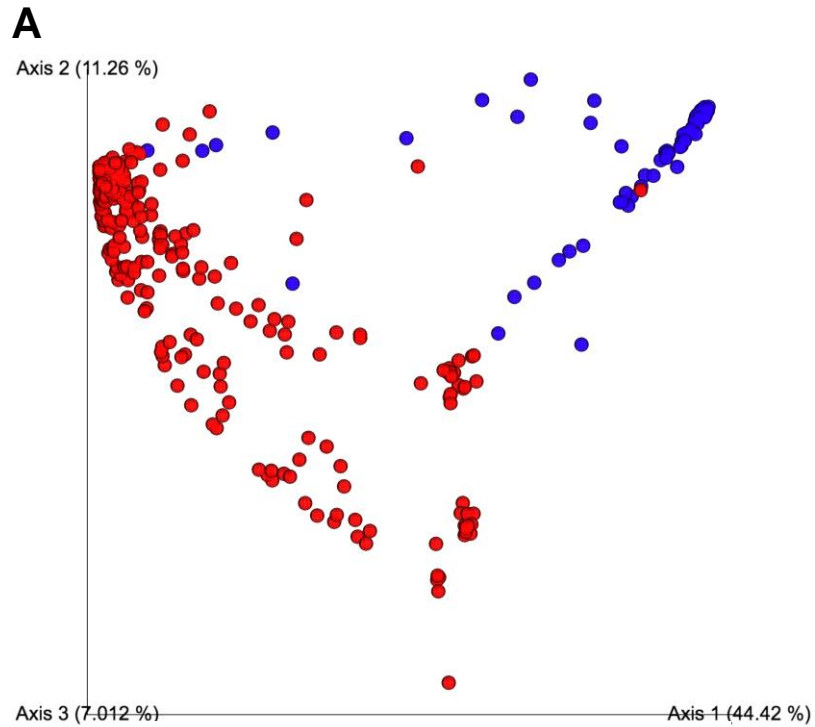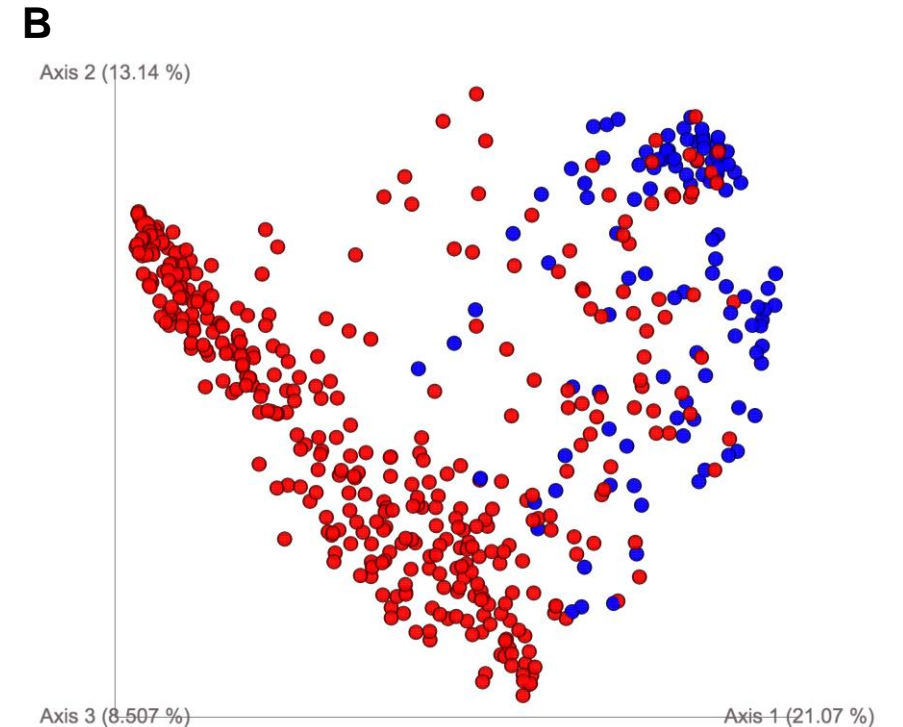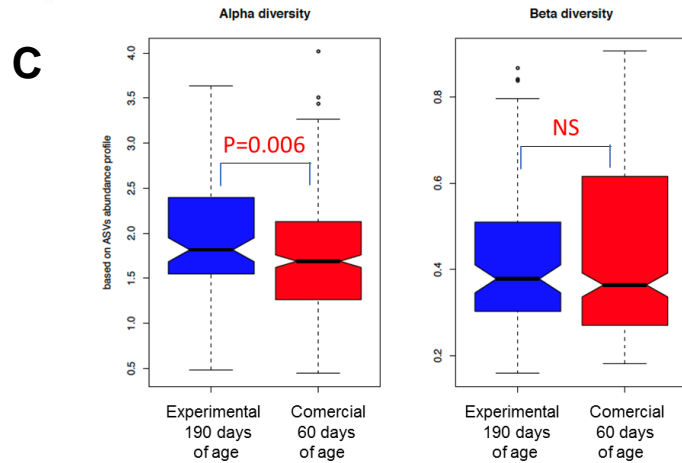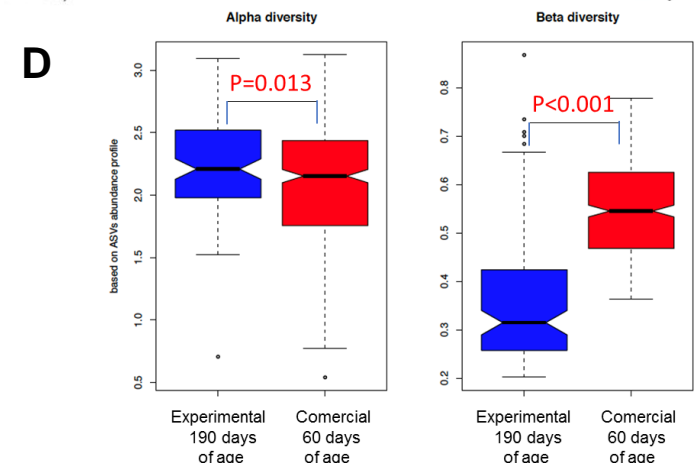

Supplement: 42523_2020_38_MOESM2_ESM.pdf [file 42523_2020_38_MOESM2_ESM.pdf]
