# Supplementary material for: Gut eukaryotic communities in pigs: diversity, composition and host genetics contribution
Source: PubMed Central journal article supplement (PMC7807704; doi:10.1186/s42523-020-00038-4), 2020-05-07

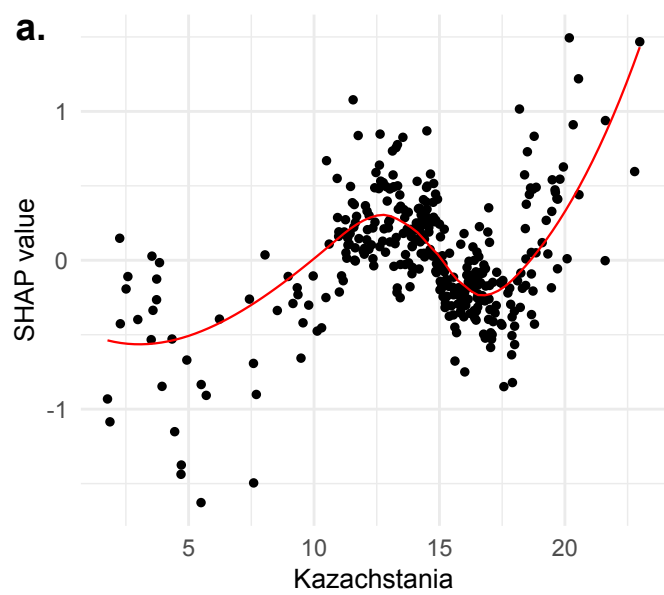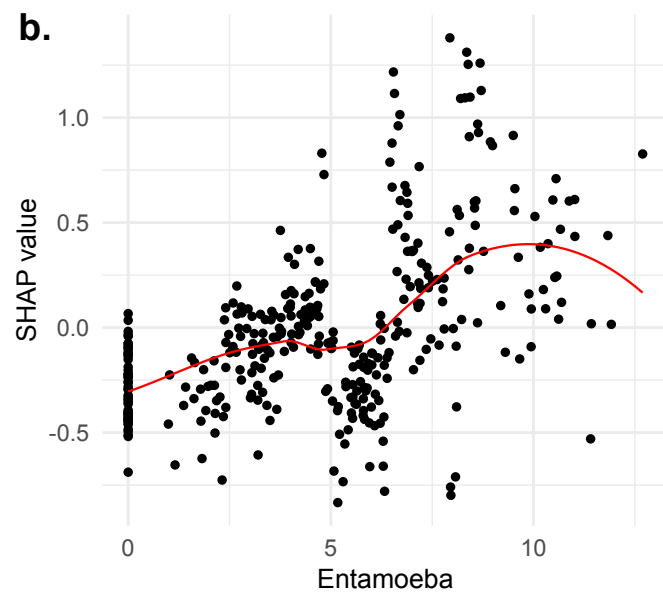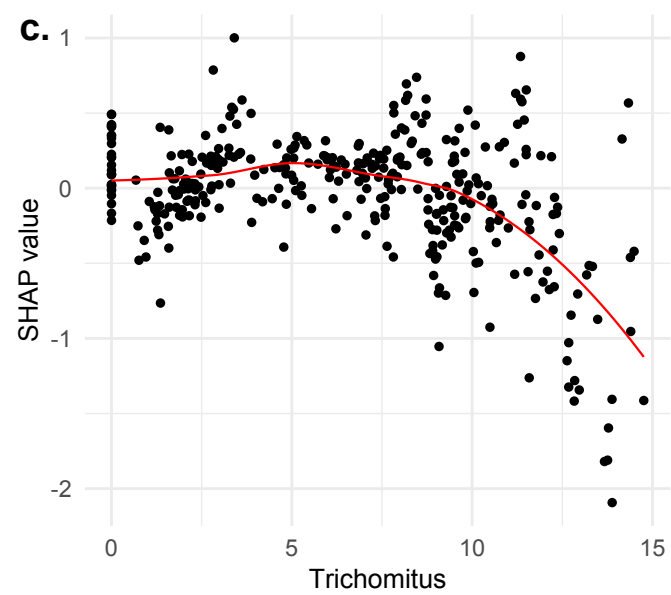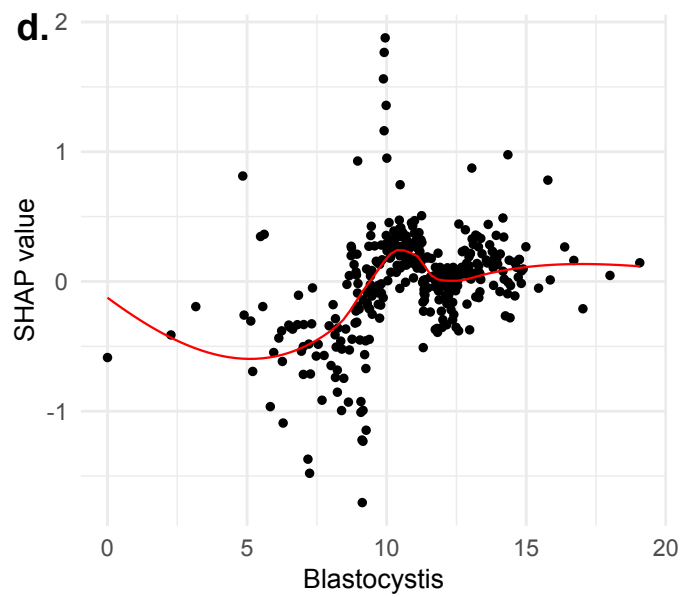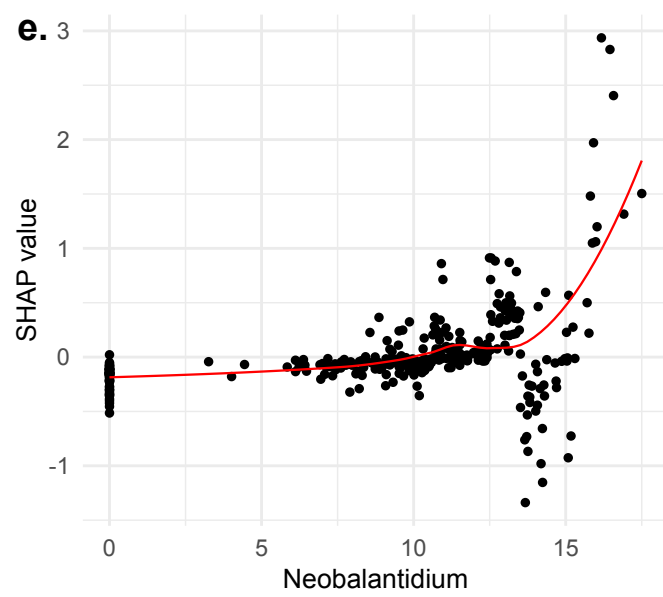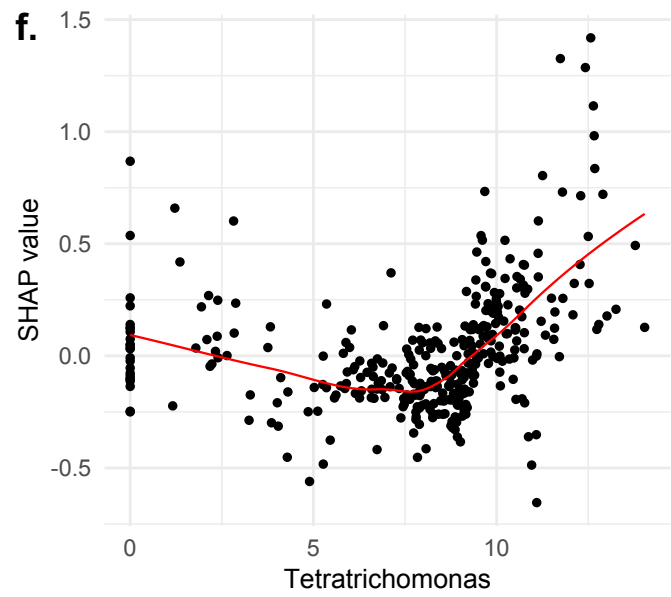

Supplement: 42523_2020_38_MOESM7_ESM.pdf [file 42523_2020_38_MOESM7_ESM.pdf]
